# Supplementary figures and images for: Nano-volume drop patterning for rapid on-chip neuronal connect-ability assays
Source: Royal Society of Chemistry journal article supplement (doi:10.1039/c3lc50564b), 2013-01-01

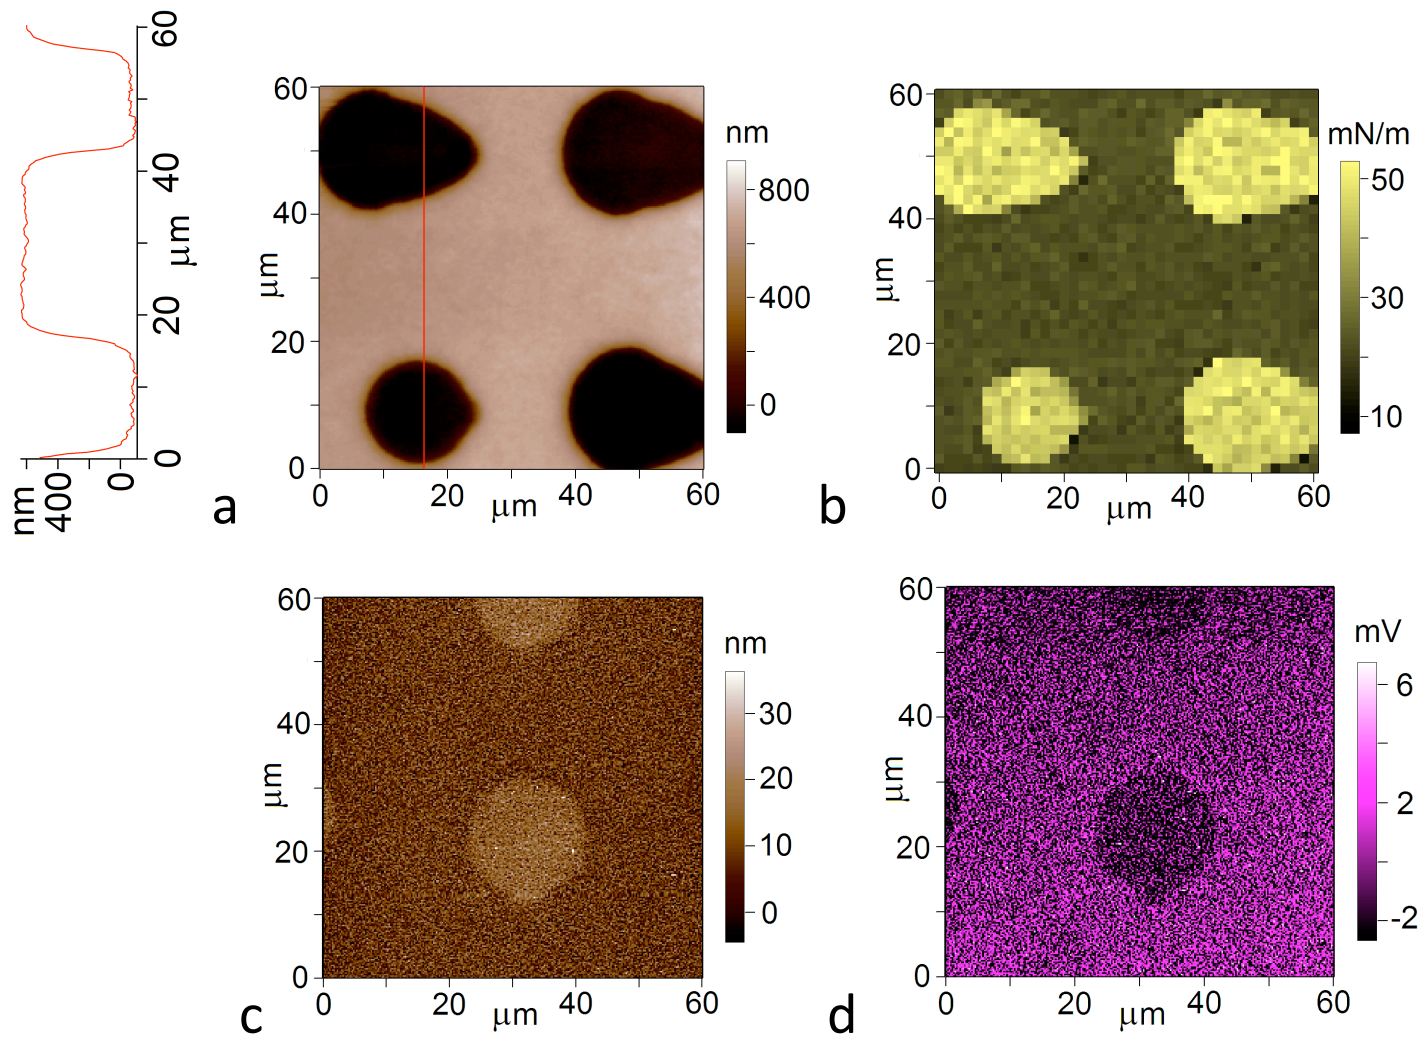

Supplement: c3lc50564b.pdf [file c3lc50564b.pdf]

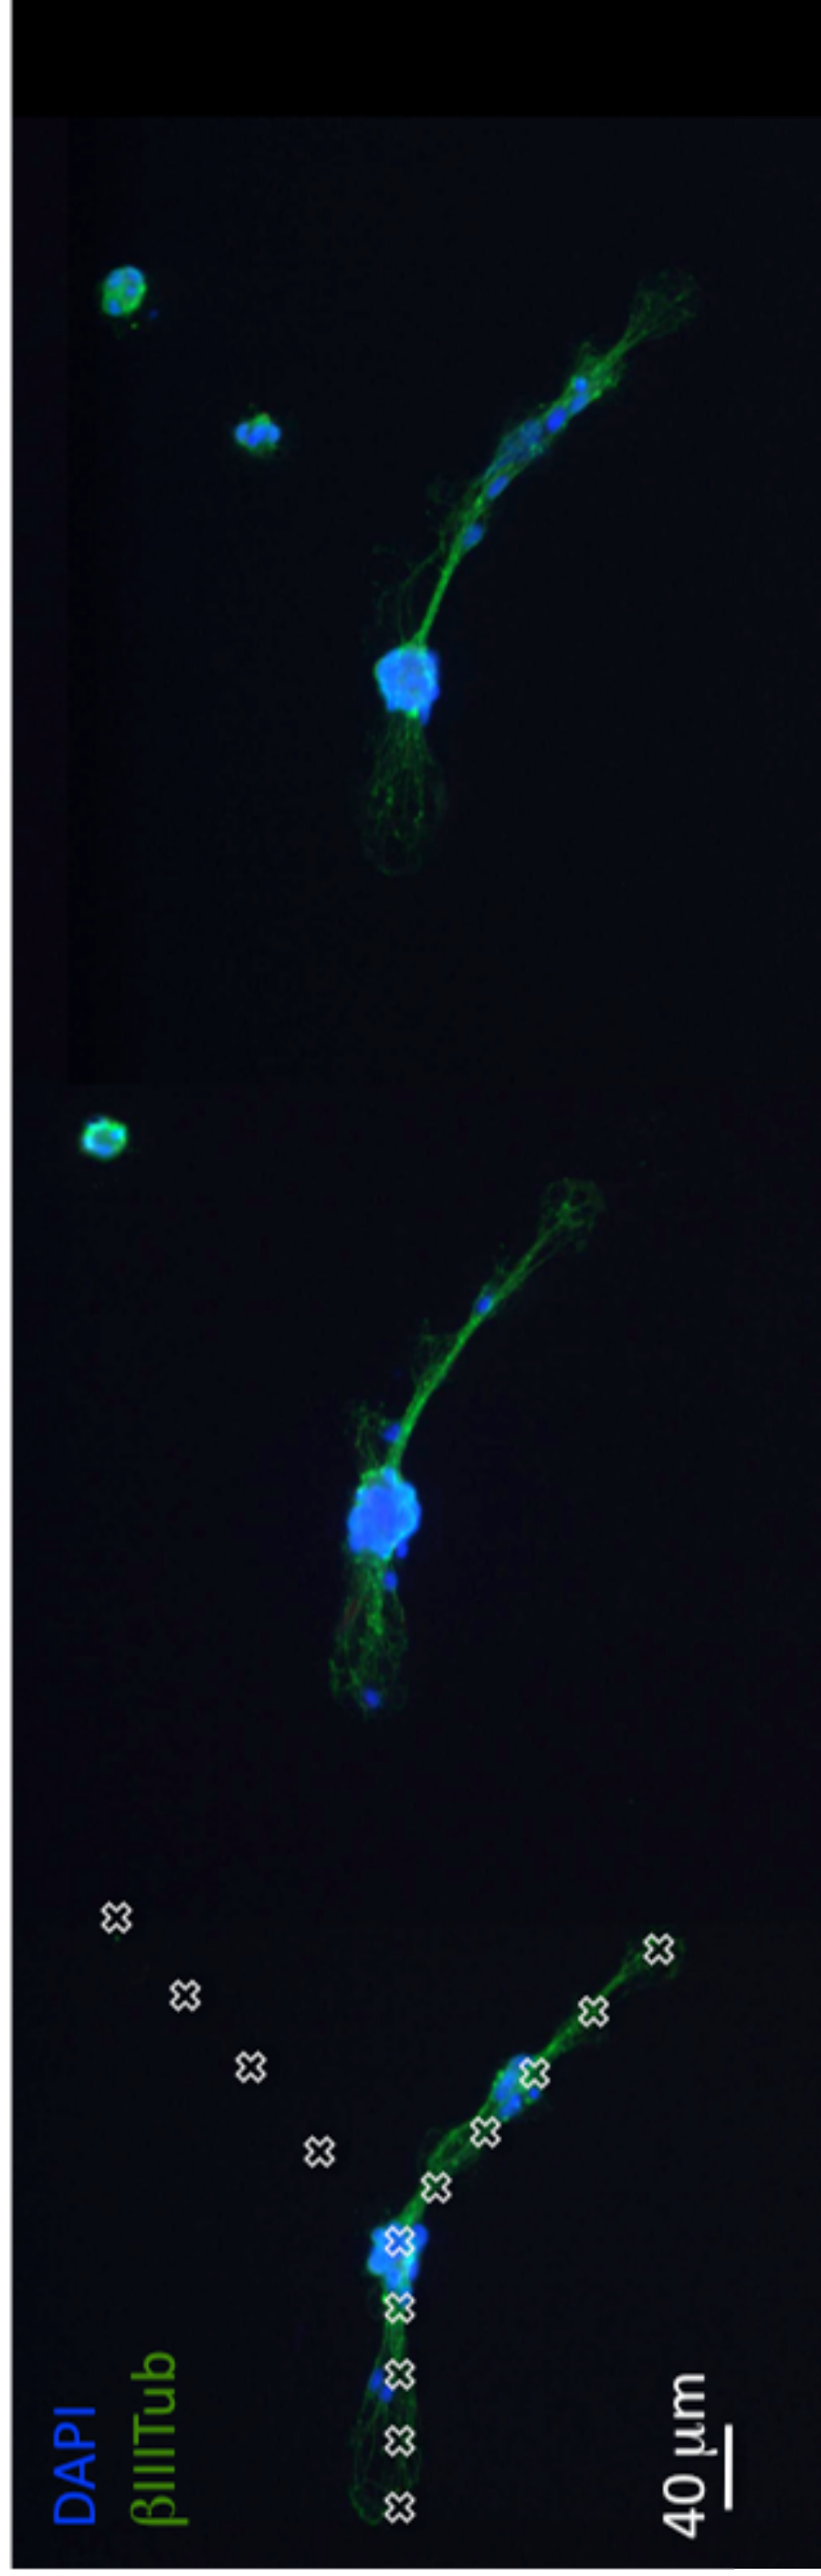

Supplement: c3lc50564b_5.pdf [file c3lc50564b_5.pdf]
